# Supplementary material for: The binding capability of plasma phospholipid transfer protein, but not HDL pool size, is critical to repress LPS induced inflammation
Source: PubMed Central journal article supplement (PMC4746621; doi:10.1038/srep20845), 2016-02-09

The binding capability of plasma phospholipid transfer protein, but not HDL pool size, is critical to repress LPS induced inflammation

**Yang Yu<sup>1,4#</sup>, Yingjie Cui<sup>1#</sup>, Yanan Zhao<sup>1#</sup>, Shuai Liu<sup>1</sup>, Guohua Song<sup>1,4</sup>, Peng Jiao<sup>1</sup>, Bin Li<sup>1</sup>, Tian Luo<sup>1</sup>, Shoudong Guo<sup>1</sup>, Xiangjian Zhang<sup>3</sup>, Hao Wang<sup>1</sup>, Xian-Cheng Jiang<sup>2</sup>, Shucun Qin<sup>1\*</sup>**

<sup>1</sup>Key Laboratory of Atherosclerosis in Universities of Shandong and Institute of Atherosclerosis, Taishan Medical University, Taian, China, 271000

<sup>2</sup>Department of Anatomy and Cell Biology, SUNY Downstate Medical Center, New York, USA, 11203

<sup>3</sup>Hebei Collaborative Innovation Center for Cardio-cerebrovascular Disease and Hebei Key Laboratory of Vascular Homeostasis, Shijiazhuang, China, 050000

<sup>4</sup>School of Basic Medicine, Taishan Medical University, Tai'an, China, 271000

**Supplementary-FIGURE-1. STAT3-SOCS3 pathway was not activated in BMDM or RAW264.7 cells induced by LPS.** WT or PLTP<sup>-/-</sup> BMDM was culture for 2 days without refreshing culture media for secreted PLTP accumulation. Glyburide was added to inactive ATP binding cassette A1 (ABCA1) 30min before LPS stimulation. The nuclear extract was probed with anti-phosphorylated signal transducer and activator of transcription 3 (STAT3). Histone 3 (H3) were employed as nuclear protein loading controls. **A**, upper panel, pSTAT3 contents in nucleus treated with Glyburide or/and LPS; lower panel, densitometry analysis of pSTAT3 contents. **B**, upper panel, SOCS3 contents in cytoplasm; lower panel, densitometry analysis of SOCS3 contents. PLTP siRNA or control siRNA transfected RAW264.7 cells were stimulated with LPS for 24h, the nuclear and cytoplasmic extracts were detected with anti-pSTAT3 and anti-SOCS3 respectively. **C**, Nuclear pSTAT3 content and densitometry analysis. **D**, Cytoplasmic SOCS3 content and densitometry analysis. These results are a representative of 3 independent experiments. \*, P<0.05, NS, no significance.

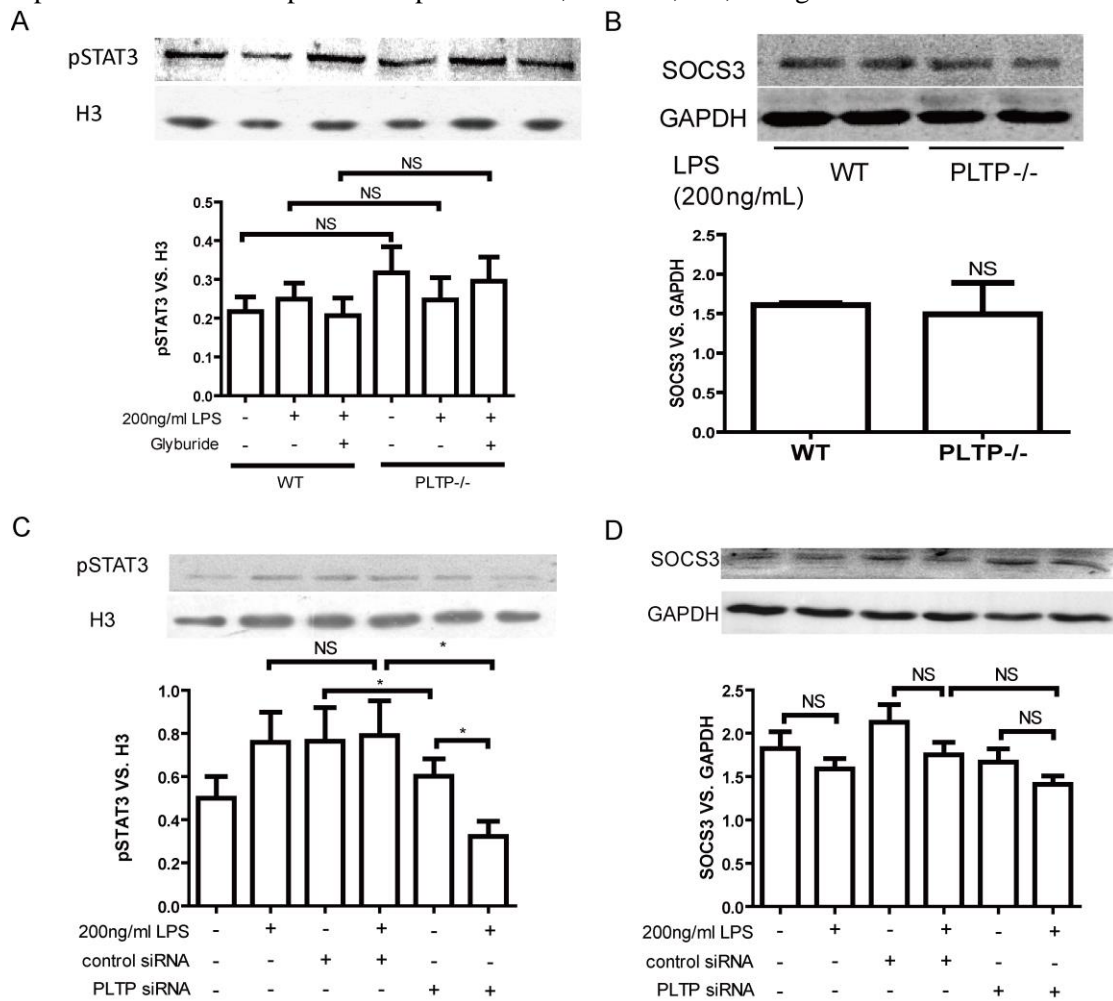

**Supplementary-FIGURE-2.** The full length gels of PLTP and FITC conjugated LPS were listed below. FITC conjugated LPS (FITC-LPS) was incubated with rPLTP and albumin, respectively. The mixtures were loaded in native gel. The fluorescence of FITC-LPS was photographing (Excitation: 488nm, Emission: 525nm). The assays were conducted for 3 times and the representative whole length gel was shown.

|                      |   |   |   |   |   |   |
|----------------------|---|---|---|---|---|---|
| active rPLTP (0.6μg) | - | + | - | + | - | - |
| 95 - PLTP (0.6μg)    | - | - | - | - | - | + |
| albumin (0.6μg)      | - | - | + | - | + | - |
| FITC-LPS (0.8μg)     | + | + | - | - | + | + |

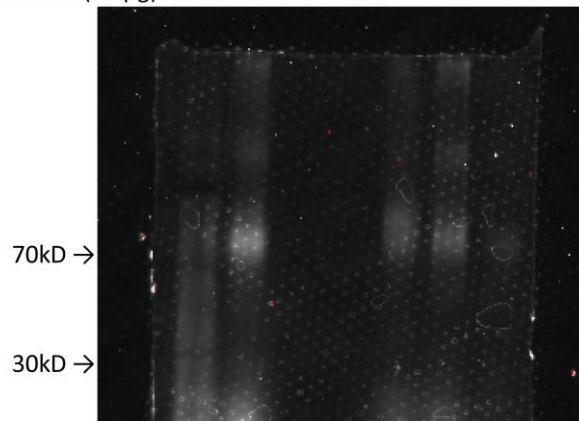

**Supplementary-FIGURE-3.** IFN- $\gamma$  induced NF $\kappa$ B activation was not changed in PLTP deficient macrophages and PLTP knockdown RAW264.7. Bone marrow derived macrophages (BMDM) or RAW264.7 were stimulated with IFN- $\gamma$ (100ng/mL) for 0, 30, 60, 120min, respectively. The nuclear and cytoplasmic extracts were determined with anti-p65 and anti-I $\kappa$ B $\alpha$ , respectively. Anti-histone 3 (H3) and anti-GAPDH antibodies were employed as nuclear and cytoplasmic protein loading controls, respectively. **A**, Nuclear p65 and cytoplasmic I $\kappa$ B $\alpha$  in BMDM from wild type mice (WT) VS. PLTP knockout (PLTP<sup>-/-</sup>). **B**, Densitometry analysis of nuclear p65 and cytoplasmic I $\kappa$ B $\alpha$  in BMDM. **C**, PLTP knockdown was conducted via siRNA (150pmol/L for PLTP siRNA and control siRNA, respectively) transfection. Nuclear p65 and cytoplasmic I $\kappa$ B $\alpha$  from control siRNA or PLTP siRNA treated RAW264.7. **D**, Densitometry analysis of nuclear p65 and cytoplasmic I $\kappa$ B $\alpha$  in RAW264.7. These results are a representative of 3 independent experiments. \*, P<0.05; NS, no significance.

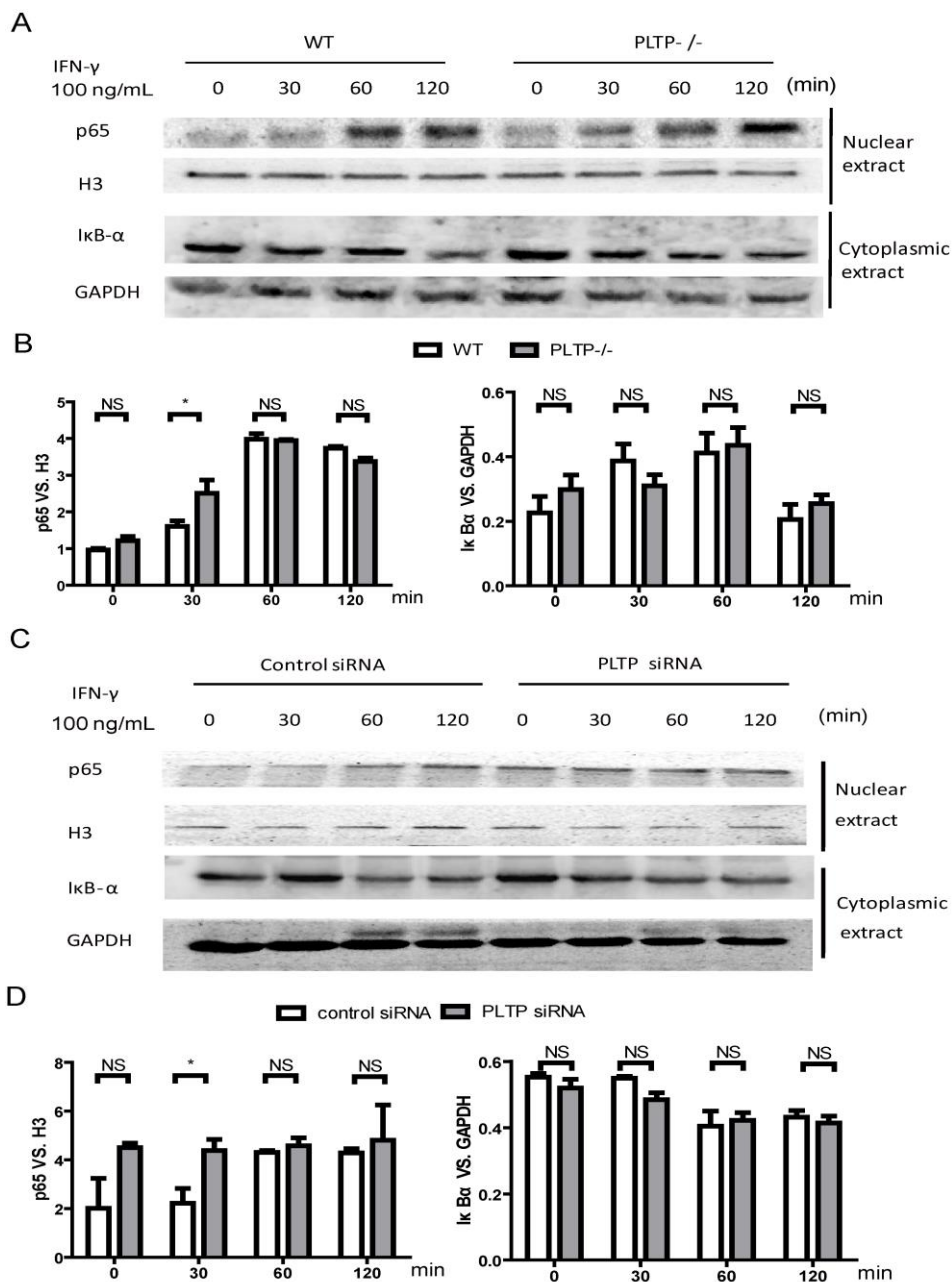

Supplement: srep20845-s1.pdf [file srep20845-s1.pdf]
